1 **Paleochronic reversion in *Psophocarpus*, the decompression function in floral**  
2 **anatomic fields**

3 170506-000156

4 Edward.G.F. Benya <sup>a, b, \*</sup> [benya@unisinis.br](mailto:benya@unisinis.br) <http://www.egfbenya.com>

5 ORCHID iD: [0000-0002-8566-8346](https://orcid.org/0000-0002-8566-8346)

6 doi: <http://dx.doi.org/10.1101/070540>

7  
8 <sup>a</sup>*UNISINOS (Universidade do Vale do Rio dos Sinos), IPP (Instituto de Pesquisa de*  
9 *Planárias)*; visiting, where analysis was done.

10 <sup>b</sup>*Escola Agr. Sto. Afonso Rodriguez, Socopo, Cx. P. 3910, 64.051-971 Teresina, Piauí,*  
11 *BRAZIL;*

12 <sup>b</sup>*Quintal Botânico, Residência dos Jesuítas, 62.900-000 Russas, Ceará, (BRAZIL)*

13 where research was done.

14 \* corresponding author

15 phone: (55) 51 3081 4800

16 FAX: (55) 51 3081 4849

17 **Abstract**

18 **Paleochronic reversion (an atavism) in *Psophocarpus* presents a basic floral phylloid**  
19 **ground state. That ground state can quickly change as permutation transformation**  
20 **(T<sub>X</sub>) begins. The form of permutation can vary as phyllotactic phylloid (T<sub>Phylld</sub>) and/or**  
21 **floral axial decompression (T<sub>Axl</sub>) presenting linear elongation (T<sub>Long</sub>), rotational (T<sub>Rtn</sub>)**  
22 **and/or lateral (T<sub>Lat</sub>) components. Research with 70 reverted floral specimens**  
23 **documented varying degrees of phyllotactic permutation at the bracts (Bt) region and**  
24 **inter-bracts (IBS) sub-region of the pre-whorls pedicel-bracts anatomic zone.**  
25 **Permutation further yielded an inter-zonal periclial stalk (PCL). It continued at**  
26 **the floral whorls zone: the calyx (Cl), corolla (Crla), androecium (Andr), and**  
27 **gynoecium (Gynec) with components therein. These organ regions present a**  
28 **continuum as an axial dynamic vector space  $\mathcal{E}T_{Axl}$  of floral permutation dominated**  
29 **by axial expansion (AE) so that an anatomic sequence of permutation activity runs**  
30 **from the bracts (Bt) region to the carpel (Crpl) inclusive with components therein,**  
31 **summarized by the formula:**

32  $\Sigma F Bt_{(1,...,z)} \pm S IBS_{(1,...,x)} \pm \wedge F PCL + F Cl + \wedge F Crla + \wedge F Andr \pm S \text{ stamen fltn} \pm S$   
33  $Andr \text{ spiral} + \wedge F Gyncm \pm S Gnf \pm \wedge S Cupl-Lk + \wedge S Crpl \pm (Crpl \text{ web} \pm VASCARP \pm Crpl$   
34  $diadn \pm Crpl \text{ fltn} + [fltn \text{ no}] \pm Crpl \text{ Rtn}) = T_X$ . **The flower reverts from a system of determinate**  
35 **growth to one of indeterminate growth.**

36  
37 **Key words:** phylloid; axial expansion (AE); demarcation event; vector space, determinate  
38 growth, indeterminate growth

39 **Running title: Paleochronic reversion: floral axial permutation**

## 1. Introduction

Shoot apical meristem (SAM) genesis follows a biophysical compressed, cylindrical form whose structuring function is highly specific (Besnard et al. 2014). Classic studies have documented a “steady-state approximation for cylindrical shoot models” (Young, 1978) of the SAM whose single organ constitution, phyllotaxis and development (i.e. leaf) presents a specificity of form, at minimal variation, that is captured and summarized with precision in a single complete model (Green and Baxter, 1987; Young, 1978). The resulting compact, organ sequence of leaves presents biophysical fields as nodes and internodes whose identity is verified at bud-burst and bloom. Permutative internodal elongation ( $T_{Long}$ ) decompression reveals phyllotactic order that, although variable, is precise (Jeune and Barabé, 2006).

That structure and exactitude change as the SAM undergoes “evocation or induction” (transformation “ $T_x$ ”) to a floral meristem (FM) whose organ composition amplifies from a single leaf morphology in the SAM to multiple organ morphologic forms of converted leaves (Battey and Lyndon, 1990; Ditta, et al. 2004; SurrIDGE, 2004; Weigel and Meyerowitz, 1994). In most angiosperms (Stern, 1988) those converted leaves appear at two specific floral anatomic zones of pre-whorl (i.e. pedicel and bracts) and of whorls (i.e. calyx, corolla, androecium and gynoecium). The FM maintains a compact, compressed cylindrical sequence of organs, similar to the SAM, but whose exactitude of form and sequence can be affected by homeotic genes (Coen and Meyerowitz, 1991; Goto et al. 2001; Honma and Goto, 2001; Ikeda et al. 2005; Kidner and Martienssen, Li et al. 2017; 2005; Pautot et al. 2001). The FM thus presents a structure similar to that of the SAM but as a reproductive system (Stern, 1988) whose organs usually distribute in biophysical fields of specific spirals and/or whorls regions (Endress and Doyle, 2007). Thus precision of the FM is less than that of the SAM. However it is still significantly specific and is

65 summarized by a dynamic; the ABC(DE) model (Coen and Meyerowitz, 1991; Honma and  
66 Goto, 2001; Jack, 2004; Weigel and Meyerowitz, 1994) that captures and predicts floral  
67 whorls organ identity which is also verified at bud-burst and bloom through internode  
68 elongation ( $T_{Long}$ ).

69 Bud decompression permutation ( $T_{Long}$ ) (e.g. internode elongation) *in situ* (i.e. *in*  
70 *planta*) is crucial to both the SAM and the FM. It is minimal in the FM (a determinate  
71 growth organ system) and usually extensive in the SAM (an indeterminate growth organ  
72 system) (Benya and Windisch, 2007; Parcy et al. 2002).

73 The phenomenon of paleochronic reversion (i.e. an atavism) has been recognized  
74 fairly recently (Benya and Windisch, 2007). Goal of this research was to document,  
75 measure and chronicle any floral axial permutation (*in situ*) on paleochronically reverted  
76 floral specimens originating from multiple recombinants (*in planta*) of the species  
77 *Psophocarpus tetragonolobus* (L.) DC (fam. Fabaceae). Recombinants represented the two  
78 similar but significantly distinct environments where this reversion has been confirmed  
79 (Benya, 2012; Benya and Windisch, 2007). Analysis identified any significantly (SPSS,  
80 2013) intense axial elongation activity at floral anatomic zones and/or regions.

## 81 82 **2. Materials and methods**

83 Data came from 70 paleochronically reverted floral specimens at a phylloid and/or  
84 phyllome ground state (Fig. 1 [right] and 2) originating from field-grown homeotic  
85 segregants (i.e. homozygous, recessive recombinants) (Benya, 1995) of the species  
86 *Psophocarpus tetragonolobus* (L.) DC (Fabaceae). Segregants were managed for  
87 sequential collection of floral specimens for purposes of timing analysis *in situ* or post-  
88 harvest so that “reversion age” of floral specimens served as a timing mechanism.  
89 Definition of reversion age in days (RAD) is the time from initiation of reversion (day

90 zero) on the recombinant, to the harvest date (and conservation) of any reverting floral  
91 specimen from that recombinant. It is the time, counting from the onset of reversion on the  
92 recombinant to the date when a floral specimen entered the laboratory in a post-harvest  
93 cluster (Benya and Windisch, 2007), in accord with similar procedures (Lohmann et al.  
94 2010). Pre-whorls and whorls anatomic zones, both juxtaposed (Fig. 1) (Besnard et al.  
95 2014) and with phyllotactic alteration (Fig. 2 and 3) (Pinon et al., 2013) (e.g. axil  
96 “permutatively distanced” [Benya, 2012]) were examined and characterized for  
97 decompression longitudinal ( $T_{Long}$ ), rotational ( $T_{Rm}$ ) and/or latitudinal ( $T_{Lat}$ ) permutation.  
98 Changes were qualitatively recognized by location within any of two anatomic zones (the  
99 pedicel-bracts zone and the floral whorls zone) and of five morphologic regions (fields),  
100 sub-regions (sub-fields) and active structures therein. These included bracts (Bt), calyx  
101 (Cl), corolla (Crla), androecium (Andr), gynoecium (Gynec) and components therein (e.g.  
102 gynophore and/or cupule-like structure). Quantitative count of active sites per specimen  
103 then served to measure intensity and distribution of permutation.

104           Specimens in laboratory were divided over 33 clusters containing one to four reps  
105 per cluster primarily oriented to maintaining specimens for purposes of physical  
106 measurement and determining any age and/or timing variables influencing activity.  
107 Treatments were conducted in individual glass test-tubes and/or plastic containers in plain  
108 or deionized water within simple-structured laboratories. Humidity and temperatures  
109 within the laboratories followed closely those of external environmental conditions during  
110 the winter and spring seasons in the semi-arid, tropical equatorial climates of Teresina,  
111 Piauí, (05°05’S; 42°49’W, alt. 64 m), from early August to late November (Gadelha de  
112 Lima, 1987) and late September to mid November in Russas, Ceará Brazil (04°55’S;  
113 37°58’W, alt. 20 m).

## 114 **2.1 Anatomic morphologic sequence**

### 115 **2.1.1 Juxtaposition**

116 Two floral anatomic zones (i.e. pre-whorl pedicel-bracts and whorls) presented six  
117 initial regions that served to begin clarifying results by anatomic location. Both zones are  
118 specific in their “normal” organs, the respective regions of those organs and the  
119 sequence(s) that define those regions. Specimens could have parallel bracts (Bt),  
120 juxtaposed to the whorls zone; calyx (Cl), corolla (Crla), androecium (Andr) and  
121 gynoecium (Gynec); juxtaposed, linearly compact (Fig. 1 [right]) reverted specimens.  
122 Categories of permutation were then based on those from published data (Benya and  
123 Windisch, 2007).

### 124 **2.1.2 Inter-zonal permutation**

125 The possibility of phyllotactically altered specimens arose where floral axes were  
126 permuted presenting bracts that were physically “distanced” from the calyces by a  
127 pericladial stalk (PCL) resulting in inter-zonal longitudinal decompression (Fig. 3).

### 128 **2.1.3 Inter-regional permutation**

129 A third scenario postulated decompression of specimens with bracts dislocation  
130 due to development of an inter-bracts stem (IBS) (Fig. 3) (Benya and Windisch, 2007).

131 Because of their recognition as defined floral whorls (Coen and Meyerowitz 1991;  
132 Parcy, et al. 1998; Schwarz-Sommer et al. 1990), each whorl is initially treated as a distinct  
133 region for possible permutation activity notwithstanding the actual permutation  
134 documented at each. Thus four additional categories of putative decompression might  
135 occur at the floral whorls zone; the calyx, corolla, androecium and the gynoecium with its  
136 component structures especially at the carpel (Fig. 4, 5, 6) and components therein. The  
137 point of conjunction of the androecium and the gynoecium could give rise to development  
138 of a gynophore (Gnf). In possible sequence with the gynophore a cupule-like structure

(Cupl-Lk) might precede the carpel (Fig. 3). The structure is termed “cupule-like” because its homology is not yet confirmed. Thus six putative fields of permutation ( $\mathbb{F}_{(1,\dots,6)}$ ) are hypothesized herein. Recognized site permutation that could not be measured exactly (e.g. partially emerged cupule-like or gynophore from a reverted “non-blooming” floral bud), received the measure of what emerged or a minimum measure of one mm (1 mm) for purposes of statistical analysis. Latitudinal site displacement (e.g. carpel cleft webbing) was recognized but not measured because of *in situ* impossibility of such measurement while still maintaining such specimens viable, as explained below.

### 3. Results

A general transformation permutation ( $T_x$ ) arose as vascularization, diadnation, foliation ( $T_{\text{Phylid}}$ ) plus axial decompression ( $T_{\text{Axl}}$ ); as longitudinal ( $T_{\text{Long}}$ ), rotational spiraling ( $T_{\text{Rtn}}$ ) and/or lateral ( $T_{\text{Lat}}$ ) webbing function. This function varied in its diversity and distribution between the two anatomic zones (ANOVA,  $F_{7, 62} = 2.749$ ,  $p = 0.015$ ), among the six regions within those zones ( $\chi^2 = 467.732$ ,  $p \leq 0.005$ ,  $df = 5$ ) and its distribution within anatomic regions (ANOVA,  $F_{31, 38} = 2.370$ ,  $p \leq 0.006$ ). Permutation usually occurred *in situ* (*in planta*). However it could continue into laboratory. Re-measurement of a sample of 25 specimens in laboratory showed a total of 7.0 mm of PCL and/or IBS development among two specimens; one mm of PCL and six of IBS, statistically not significant ( $\chi^2 = 0.0144$ , NS,  $df = 1$ ). Thus decompression *in situ* (immediate post-harvest) was taken as the overall measure of permutation in accord with similar procedures (Piao et al. 2015).

Loci of the bracts anatomically defined the bracts region which extended from zero (i.e. bracts parallel or normal) (Fig. 2) to 12 mm depending on dislocation and development of any IBS (Fig. 3). This occurred on 31 specimens. Inter-zonal

164 decompression yielded a PCL which developed in lengths of one to 38 mm on 60  
165 specimens. This was usually accompanied (but at times preceded or succeeded) by  
166 formation of an IBS since distinct genes determine the phenotypic presence of each  
167 structure as already reported (Benya and Windisch, 2007). One or both of these then  
168 constituted the “Axial active” ( $n = 63 \sum = 807.0$  mm) measure of permutation activity on  
169 most specimens. PCL and IBS dislocations were distinct. Each could occur separately  
170 (i.e. three IBS and 32 PCL) on different specimens or concurrently on 28 specimens as  
171 did cupule-like structures while gynophore development occurred on nine specimens.

172 The sum of the lengths of the IBS and PCL (i.e. “Axial active” elongation) plus  
173 those of the gynophore and cupule-like structure formed the “Axial complete” measure ( $n$   
174  $= 65 \sum = 1115.0$  mm) of “longitudinal decompression”. “Axial active” was the principal,  
175 significant ( $F_{31, 38} = 7.611, p < 0.000$ ) component (72.38%) of “Axial complete”  
176 decompression whose length was more specifically constituted by PCL lengths ( $F_{30, 29} =$   
177  $4.430, p < 0.000$ ).

178 Linear axial displacement of a locus or loci in an established direction or directions  
179 (i.e. along the floral axis) was driven by axial expansion (AE). AE thus defined the  
180 principal demarcation components and all of the measured metric components (1115.0  
181 mm) of longitudinal ( $T_{Long}$ ) permutation (128 of 274 sites) where each “demarcation event  
182 is a vector” (Green and Baxter 1987). A spiral ( $T_{Rtn}$ ) displacement of carpels of the  
183 gynoecium arose ( $n = 6$  specimens), a topological dislocation vector function (rotational  
184 axial elongation). Webbing between carpel clefts ( $n = 39$ ) is a lateral axial vector function  
185 ( $T_{Lat}$ ). Both  $T_{Rtn}$  and  $T_{Lat}$  are components of AE. However all three present signs of distinct  
186 vector functions. Their sum total equals axial complete expansion ( $T_{Axl}$ ); so that:

$$187 \quad AE = T_{Axl} = T_{Long} + T_{Rtn} + T_{Lat} \quad (1)$$



188 Regional decompression on two of the seven juxtaposed bracts-calyx specimens  
189 presented cupule-like structures. Thus the final ratio of confirmed axial decompression  
190 permutation to non-axial decompression specimens was 65:5.

191 Overall permutation activity was significantly more intense within the whorls zone  
192 (183 sites) than within the pre-whorls zone (91 sites) ( $t = 2.360, p = 0.021, df = 69$ ).  
193 Research then focused on anatomic regions within both zones, the intensity and possible  
194 sequence(s) of decompression within and between regions, plus any distinctions in  
195 decompression between the two significantly different environments (Benya, 2012). “Axial  
196 complete” measure (AE = 1115 mm) of longitudinal floral decompression occurred over  
197 2421 “reversion age in days” (RAD) at a mean value of  $0.461 \text{ mm RAD}^{-1}$  with a range of  
198 0.003 to  $3.563 \text{ mm RAD}^{-1}$ .

199 The difference between the 128 decompression sites and the 146 general  
200 permutation sites was not significant ( $\chi^2 = 1.1825, \text{NS}, df = 1$ ). Timing of both  
201 decompression and general permutation functions at the gynoecium was significant  
202 across and within both environments ( $F_{24, 39} = 2.586, p \leq 0.004$ ). Cupula-like structuring  
203 was significant only in Russas ( $F_{4, 11} = 13.105, p < 0.000$ ). Significance continued in the  
204 diversity of sites and events at and within the carpel ( $F_{24, 39} = 3.097, p \leq 0.001$ ). This  
205 included webbing between carpel clefts only at Teresina ( $F_{19, 28} = 2.530, p = 0.013$ ),  
206 vascularization at both locations ( $F_{24, 39} = 2.765, p \leq 0.002$ ), then only at Teresina;  
207 diadnation and foliation, both at ( $F_{19, 28} = 2.395, p = 0.018$ ), and putative ovule  
208 permutation ( $F_{19, 28} = 2.919, p \leq 0.005$ ), (also as vascularization, elongation, and/or  
209 foliation) in sequence and/or combination with some or all of these antecedent functions.  
210 This reflected the structural complexity of the carpel and the diversity of activity that  
211 could occur at that sub-region (Benya, 2012, Trigueros et al. 2009).

212 Parallel non-webbed carpel clefts at both environments preceded any permutation  
213 function at the carpel and probably preceded permutation at any other anatomic region.  
214 This is the “ground state” of the carpel. Permutative decompression of the carpel begins  
215 with webbing between carpel clefts (Fig. 4) and/or spiraling (Fig. 3). Both webbing and  
216 spiraling were virtually impossible to time through RAD in either environment as both  
217 were *in situ* functions and usually preceded *in planta* flower bloom thus impeding simple  
218 empirical verification. They were, however confirmed as “initiating functions” by means  
219 of dissection of pre-bloom flowers (i.e. flower buds) whose further permutation activity  
220 was thus eliminated because of dissection.

221 Amplification at the calyces ( $n = 8$ ) ( $t = -14.049$ ,  $p < 0.000$ ,  $df = 69$ ), foliation of  
222 petals at the corolla ( $n = 2$ ) ( $t = -31.104$ ,  $p < 0.000$ ,  $df = 69$ ) (Fig. 2), plus foliation of  
223 the anther ( $n = 2$ ) ( $t = -31.104$ ,  $p < 0.000$ ,  $df = 69$ ) at the androecium all arose at low  
224 levels ( $T_{\text{Phylid}}$ ). Gynophore development was minimal over both environments ( $n = 9$ ) ( $t =$   
225  $-8.765$ ,  $p < 0.000$ ,  $df = 69$ ). Cupule-like structure development followed a norm ( $n =$   
226  $28$ ) ( $t = -1.097$ ,  $p = 0.276$ , NS,  $df = 69$ ) commensurate with decompression at the IBS ( $n$   
227  $= 31$ ) ( $t = -0.119$ ,  $p = 0.905$ , NS,  $df = 69$ ). However it showed significant negative  
228 correlation ( $r = -0.353$ ;  $p \leq 0.004$ ) with RAD because it arose early in the  
229 decompression sequence.

230 Permutation as decompression and vascularization whose origin from the ground  
231 state carpel presenting a rigorous sequence of steps significantly grounded in the genetics  
232 of decompression and vascularization is already addressed at the phenotypic level (Benya  
233 and Windisch, 2007). However its manifestation (e.g. gene activation) is significantly  
234 influenced by weather (Benya, 1995) and climate (Benya, 2012). Thus the sequence is  
235 rigorous but not invariable especially because of alleles of genes governing aspects of axial

236 decompression phenotype in a dominant:recessive Mendelian scenario (Benya and  
237 Windisch, 2007).

238 Homozygous recessive recombinants (extremely rare) could affect that sequence of  
239 steps, excluding entire steps in the sequence (i.e. webbing and/or vascularization of the  
240 carpel [a dominant phenotype]) in a multi-recessive homozygous recombinant, thus giving  
241 rise to diadnate carpels showing no webbing and no vascularization and presenting  
242 “pinnate” carpel form (Fig 7 [top]). The lateral axial function ( $T_{Lat}$ ) was attenuated or  
243 completely inactive. However the prevalence of dominant alleles plus their manifestation  
244 allowed reasonable deduction of sequence pertaining to preceding phenotypes according to  
245 established precedence (Benya and Windisch, 2007). These could terminate at any step as:  
246 un-webbed to webbed, then perhaps to vascularized, then at times to diadnation, then  
247 sometimes to foliation (Fig. 6) (Table 1).

248 Two general sequences of permutation activity are manifest in this data. The first  
249 sequence involves metric intensity of activity between anatomic zones, regions and sub-  
250 regions beginning at the bract-calyx juncture. Overall intensity of site activity ( $n = 274$ )  
251 followed a significant quadratic regression on axial complete decompression (1115 mm)  
252 (quadratic  $r^2 = 0.301$ ,  $F_{2, 67} = 14.435$ ,  $p < 0.000$ ) from bracts to whorls inclusive. That  
253 regression continued for the four floral whorls themselves ( $n = 183$  sites) (quadratic  $r^2 =$   
254  $0.230$ ,  $F_{2, 67} = 10.024$ ,  $p < 0.000$ ), into the fourth whorl gynoecium ( $n = 171$  sites)  
255 (quadratic  $r^2 = 0.197$ ,  $F_{2, 67} = 8.213$ ,  $p \leq 0.001$ ) and total carpel structures ( $n = 134$ )  
256 (quadratic  $r^2 = 0.101$ ,  $F_{2, 67} = 3.773$ ,  $p = 0.028$ ).

257 The  $T_{Lat}$  function of webbing ( $n=39$ ) (linear  $r^2 = 0.070$ ,  $F_{1, 68} = 5.103$ ,  $p = 0.027$ ),  
258 vascularization ( $n = 37$ ) (linear  $r^2 = 0.073$ ,  $F_{1, 68} = 5.326$ ,  $p = 0.024$ ), and diadnation ( $n =$   
259  $27$ ) (linear  $r^2 = 0.110$ ,  $F_{1, 68} = 8.399$ ,  $p \leq 0.005$ ) presented a sequence of significant linearly  
260 varying intensity, while carpel foliation ( $n = 25$ ) (quadratic  $r^2 = 0.104$ ,  $F_{2, 67} = 3.898$ ,  $p =$

0.025) and internal carpel foliar number ( $n = 61$ ) (quadratic  $r^2 = 0.103$ ,  $F_{2, 67} = 3.859$ ,  $p = 0.026$ ) presented significant quadratic regression on the axial complete value. Spiraling, not a necessary function of the carpel sequence, occurred at a non-significant level (six specimens) and only at Russas.

A second sequence involved timing. This placed webbing of the carpel (usually in Teresina) and/or spiraling of the carpel (usually in Russas), neither being strictly elongation functions, as initiatory or co-initiatory events closely followed by minimal but early calyx amplification on the pre-bloom flower. Diadnation and foliation of the carpel could then follow webbing in as little as 24 hours. Where carpel vascularization occurred, it usually preceded diadnation and foliation of the carpel. Vascularization is governed by a dominant allele (*VASCARP*) (Benya and Windisch, 2007). However activation of that allele depended on weather and climatic conditions (Benya, 1995, 2012). Gynophore and/or cupule-like structural formation might follow webbing.

IBS and/or PCL elongation (i.e. Axial active = 807 mm) in relation to RAD was significant, (ANOVA  $F_{24, 39} = 2.083$ ,  $p = 0.020$ ). It could be almost initiatory. However its significantly broad physically spatial distribution as a component of Axial complete length; 807 of 1115 mm (ANOVA  $F_{31, 38} = 7.611$ ,  $p < 0.000$ ), rank it among the most time consuming of events in relation to RAD ( $r = 0.195$ ,  $p = 0.122$ ,  $n = 64$ ).

As in the case of site analysis in relation to axial metric decompression (Axial complete = 1115 mm), regression analysis revealed dynamics of site establishment in relation to RAD of specimens. Overall intensity of site activity; phylloid and/or AE ( $n = 274$  sites) showed significant response to RAD (ANOVA  $F_{24, 39} = 2.285$ ,  $p = 0.011$ ) but no significant tendencies (i.e. linear, quadratic, etc.) (Suppl. Table 1). However whorls site activity ( $n = 183$ ) ( $r^2 = 0.100$ ,  $F_{2, 61} = 3.374$ ,  $p = 0.041$ ), activity at the gynoecium ( $n = 171$ ) ( $r^2 = 0.096$ ,  $F_{2, 61} = 3.256$ ,  $p = 0.045$ ), structural development internal to the carpel ( $n$

286 = 134) ( $r^2 = 0.150$ ,  $F_{2,61} = 5.392$ ,  $p \leq 0.007$ ) and even carpel spiraling ( $n = 6$  sites) ( $r^2 =$   
287  $0.214$ ,  $F_{2,61} = 8.282$ ,  $p \leq 0.001$ ) all presented significant quadratic response to RAD.

288 The plethora of dynamic activity in response to RAD beginning at the whorls zone,  
289 showed progressive intensity therein continuing into the gynoecium region and into the  
290 carpel sub-region (plus loci therein). It presented chronologic significance that was  
291 quadratic in all cases even including spiraling of the carpel (Suppl. Table 1). That  
292 plethora of activity seems to capture a dynamic whose basis lies in the progressively  
293 intensive genetic governance already identified for the whorls and carpel (Álvarez-Buylla  
294 et al., 2010; Ashman and Majetic, 2006; Coen and Meyerowitz, 1991; Prunet et al., 2008;  
295 Schwarz-Sommer et al., 1990; Weigel and Meyerowitz, 1994) and even implying genetic  
296 aspects yet to be recognized.

#### 297 298 **4. Discussion**

299 A phylloid ground state and/or various degrees of phyllome organ formation (Pelaz  
300 et al., 2000; Weigel and Meyerowitz, 1994) characterized all 70 experimental specimens.  
301 Floral meristem cancellation (Benya and Windisch, 2007), anticipated and was essential to  
302 that phylloid state. After that, most specimens entered into a permutation phase of  
303 transformation ( $T_x$ ) that could include organ foliation ( $T_{Phylld}$ ) (Fig. 2) and/or a  
304 decompression function ( $T_{Axl}$ ) of the floral axis, itself constituted by axial elongation  
305 ( $T_{Long}$ ), rotational ( $T_{Rtn}$ ) and/or lateral ( $T_{Lat}$ ) dynamic of permutation (Okabe 2011, 2015).  
306 The permutation function was significant *in situ* (*in planta*) but could extend to post-  
307 harvest. By deduction, it usually began in the carpel as webbing between carpel clefts  
308 ( $T_{Lat}$ ) and/or rotational spiraling ( $T_{Rtn}$ ). This was usually prior to flower bloom, thus  
309 specific (*in vivo*) timing and measurement of these two events was impossible. However  
310 significant negative linear correlation of carpel spiraling and near significant correlation of

311 carpel webbing ( $r = -0.416, p \leq 0.001, r = -0.221, p = 0.079$  respectively) with RAD  
312 support this conclusion. Significant linear correlation of whorls zone active sites ( $n=183$ )  
313 with axial complete permutation ( $r = 0.480, p < 0.000$ ) verify both the dynamic of whorls  
314 site activity and the intensity of that activity as informed by pre-reversion site canalization  
315 at the whorls zone.

316 Bracts regions usually entered a morphologically active phase of elongation  
317 (Bargmann et al., 2013; Benya and Windisch, 2007; Besnard et al., 2014; Pinon et al.,  
318 2013). These were the most striking in their manifestations of the permutation elongation  
319 phase as IBS and/or PCL. However decompression as gynophore and/or cupule-like  
320 structure formation contributed to overall axial elongation. Rare yet at times solitary  
321 presence of PCL, IBS and cupule-like structures indicated that a distinct vector governs  
322 each of these decompression events. Those distinctions coincide with Mendelian  
323 proportions indicating dominant:recessive genetic functions underlying IBS and PCI  
324 presence or absence (Benya, 2012; Benya and Windisch, 2007). Significant negative linear  
325 correlation of cupule-like structures, number ( $n = 28, r = -0.353, p \leq 0.004$ ) and length ( $n$   
326  $= 211, r = -0.659, p \leq 0.001$ ), with RAD but their positive correlation with Axial  
327 complete measure, respectively ( $r = 0.381, p \leq 0.001$ ) and ( $r = 0.509, p \leq 0.007$ ), verifies  
328 their initiation early in the elongation process. It further supports the premise that their  
329 origin is through distinct genetic governance. Specific governance at the gynophore cannot  
330 be determined from this data.

331 Bracts (with any IBS therein) plus any PCL show continuity to the calyces  
332 presenting a succession of distinct fields and a sub-field ( $\mathbb{F} \text{ Bt} \pm \mathbb{S} \text{ IBS} \pm \mathbb{A} \mathbb{F} \text{ PCL} + \mathbb{A} \mathbb{F}$   
333  $\text{Cl}$ ) representing temporal and physically spatial activity. The PCL is a biophysical field ( $\mathbb{F}$   
334  $\text{PCL}$ ) whose varying morphologic length, serves to distance the Cl field ( $\mathbb{F} \text{ Cl}$ ) and Bt field  
335 ( $\mathbb{F} \text{ Bt}$ ) from each other. The anatomic regions ( $\mathbb{F} \text{ Bt}_{(1, \dots, z)} \pm \mathbb{S} \text{ IBS}_{(1, \dots, x)} \pm \mathbb{A} \mathbb{F} \text{ PCL} \pm \mathbb{F} \text{ Cl}$

336  $\pm \dots \wedge \mathbb{F} \text{Gyncm}$ ) constitute a permuted floral axis ( $A_{x1}$ ), beginning at Bt regions and  
337 extending to the carpel ( $Cr_{p1}$ ) of the gynoecium inclusive. It is a biophysical continuum of  
338 function, but not a AE structural continuum. The physical sequence of fields  $\mathbb{F} \text{Bt}_{(1, \dots, z)}$  ...,  
339  $\mathbb{F} \text{Cl}$  show AE continuity, but no AE occurred at the corolla or androecium where  
340 permutation was limited to the phylloid ( $T_{\text{Phylld}}$ ) function. AE continuity was interrupted. It  
341 arose again at  $\mathbb{F} \text{Gyncm} \pm \mathbb{S} \text{Gnf} \pm \wedge \mathbb{S} \text{Cupl-Lk}$ . Thus the anatomic region  $\mathbb{F} \text{Bt}_{(1, \dots, z)} \pm \mathbb{S}$   
342  $\text{IBS}_{(1, \dots, x)} \pm \wedge \mathbb{F} \text{PCL} \pm \mathbb{F} \text{Cl} \pm \dots \wedge \mathbb{F} \text{Gyncm}$  is a continuum of function. It is a dynamic  
343 longitudinal linear axial vector space  $\mathcal{L}T_{A_{x1}}$  but not a continuous AE structural space.

344 Besides distancing bracts from calyces, a PCL also distanced the entirety of the  
345 floral pre-whorls pedicel-bracts anatomic zone from the whorls anatomic zone. Results  
346 indicate definite regional homeostatic canalization associated with paleochronic floral  
347 reversion (Benya and Windisch, 2007). Canalization continued to be manifest as floral  
348 permutation up to and including axial elongation at these anatomic zones and their  
349 respective organs regions (Okamuro et al., 1993).

350 Lack of any significant correlation between RAD and permutation activity at the  
351 calyces, corollas and androecium reflects their robust phenotypes arising from canalization  
352 of pre-reversion organ identities (Debat and David, 2001; Okamuro et al. 1993) and  
353 resulting stability at these regions. Intensity of activity diminished between the calyx (eight  
354 specimens) and gynophore (nine specimens) to a minimum at the corolla and androecium  
355 (two specimens each). It then increased from nine at the gynophore to 28 specimens with a  
356 cupule-like structure and then to the 63 specimens with a total of 134 carpel permutation  
357 sites. Cubic regression thus reflected the inversely varying robusticity of organ identity  
358 (due to pre-reversion canalization) with permutation function from pre-whorls into whorls  
359 floral sites. Presence but lack of any significant relation of the spiraling function ( $n = 6$ )  
360 with overall permutation site activity ( $n = 274$ ) reflects the distinction between whorls

361 structuring (and any whorls structuring function) and the spiraling function (Okabe, 2011).  
362 The sequence was completed by the invariably consistent negative linear correlations of  
363 overall site activity, whorls site activity (Suppl. Table 1) plus regions therein including  
364 gynoecium and carpel spiraling, webbing and vascularization with RAD. It verified the  
365 intensity of decompression activity early in the permutation phase as lability of established  
366 floral morphologic compression following paleochronic reversion. That lability diminished  
367 over time.

368 Juxtaposition of floral anatomic zones and organs regions is the phyllotactic norm  
369 for this and most other angiosperm species. During elongation, floral organs maintain their  
370 specified identities at definite positions of their respective loci (Benya and Windisch,  
371 2007). However expansion of anatomic organ regions, by means of PCL, IBS, gynophore,  
372 etc. can augment organ regional longitudinal dimensions and even change locus orientation  
373 and fields.

## 374

## 375 **5. Conclusion**

376 Sexually reproductive flowers can revert (transmutation) from the determinate  
377 growth reproductive state to a non-reproductive phylloid state. Reverted flowers can then  
378 enter a permutation phase where physical spacing of organ regions occurs along and within  
379 the floral axis. Distinct biophysical functions affect that permutation phase.

380 Spiraling function in the SAM can be captured with mathematical precision  
381 (Okabe, 2011) while overall SAM genesis can be captured in a simple model (Young,  
382 1978). That model can be expanded in the FM to a distinct ABC(DE) model of homeotic  
383 gene function for floral whorls genesis. Cancellation of the dynamic of the ABC(DE)  
384 model leads to a floral ground state. A permutation function can then arise. The  
385 permutation functions documented here manifest significant and variable presence in a



386 significantly specific but variable timing sequence as reverted flowers demonstrate a return  
 387 to indeterminate growth through AE (axial expansion) in this “Axial permutation” model.

388 This model contains both axial decompression and foliation components

$$389 (T_X = T_{Axl} + T_{Phyld}) \quad (2)$$

390 the prior of which is composed of axial longitudinal ( $T_{Long}$ ), spiral ( $T_{Rtn}$ ) and latitudinal  
 391 ( $T_{Lat}$ ) components so that:

$$392 T_{Axl} = T_{Long} + T_{Rtn} + T_{Lat} \quad (3)$$

393 where:

$$394 T_X = (T_{Long} + T_{Rtn} + T_{Lat}) \subset T_{Axl} + T_{Phyld} \quad (4)$$

395 Metrics of  $T_{Long}$  are documented in this data. Presence of  $T_{Rtn}$  and  $T_{Lat}$  are qualitatively  
 396 recognized but quantitative aspects of each are not addressed herein. Thus:

$$397 T_{Long} = x_{(i,\dots,j)}, T_{Rtn} = 0, T_{Lat} = 0$$

$$398 \text{where:} \quad AE = T_{Axl} = T_{Long} + T_{Rtn} + T_{Lat} \quad (1)$$

$$399 \text{so that:} \quad AE = T_{Axl} = x_{(i,\dots,j)} + 0 + 0$$

400 Thus since  $T_{Rtn}$  and  $T_{Lat}$  are effectively “zero” in this data, therefore:

$$401 AE = T_{Axl} = T_{Long} \quad (5)$$

402 Variability of the ABC(DE) model is due to variable activity of homeotic genes.

403 Variability of this “Axial permutation model” is also due to homeotic genes (Benya and  
 404 Windisch, 2007) but their activation is significantly correlated with climatic and weather  
 405 factors (Benya 2012). Resulting anatomic sequence of permutation activity then runs from  
 406 the bracts (Bt) region to the carpel inclusive with components therein. The formula:

$$407 \mathbf{\Sigma F Bt}_{(1,\dots,z)} \pm \mathbf{S IBS}_{(1,\dots,x)} \pm \mathbf{\Lambda F PCL} + \mathbf{F Cl} + \mathbf{\Lambda F Crla} + \mathbf{\Lambda F Andr} \pm \mathbf{S stamen fltn} \pm \mathbf{S}$$

$$408 \mathbf{Andr spiral} + \mathbf{\Lambda F Gyncm} \pm \mathbf{S Gnf} \pm \mathbf{\Lambda S Cupl-Lk} + \mathbf{\Lambda S Crpl} \pm (\mathbf{Crpl web} \pm \mathbf{VASCARP} \pm \mathbf{Crpl}$$

$$409 \mathbf{diadn} \pm \mathbf{Crpl fltn} + [\mathbf{fltn no}] \pm \mathbf{Crpl Rtn}) = \mathbf{T_X}. \text{ (Supplementary Material)} \quad (6)$$

410 summarizes an anatomic sequence of permutation transformation ( $T_X$ ) in its phylloid  
411 ( $T_{Phylld}$ ) and floral axial decompression ( $T_{Axl}$ ) aspects. This includes elongation ( $T_{Long}$ ),  
412 latitudinal ( $T_{Lat}$ ) and/or rotational ( $T_{Rtn}$ ) functions. The principal components of the  
413 longitudinal axial vector space ( $T_{Long}$ ) within this model ( $T_{Axl}$ ) are captured by the  
414 formula:

$$415 \quad \mathbb{F} Bt_{(1,\dots,z)} \pm \mathbb{S} IBS_{(1,\dots,x)} \pm \wedge \mathbb{F} PCL.. \pm \wedge \mathbb{S} Gnf \pm \wedge \mathbb{S} Cupl-Lk \approx T_{Long} \in T_{Axl} \text{ as } \mathcal{L}T_{Long} \quad (7)$$

416 The early lability of floral form following paleochronic reversion hearkens to the  
417 unusually high labile floral phyllotaxis in ancestral angiosperms (Endress and Doyle,  
418 2007). The presence of both linear, spiral, and latitudinal functions in this model and their  
419 distinct responses to permutation and timing variables (Suppl. Table 1) may be unique for  
420 paleochronically reverted flowers. The question of their simultaneous or sequential  
421 presence is not resolved by this data.

422 Ancestral reference further supports the distinction between decompression and  
423 spiral functions documented by this data. The spiraling function then gives rise to the  
424 question of its origin; primitive or derived (Endress and Doyle, 2007). However,  
425 distinction of longitudinal, latitudinal and topologic functions seems quite clear with the  
426 suggestion that it may well be primitive. Research in fact has been such that  
427 “...developmental studies have focused on vegetative rather than floral phyllotaxis because  
428 vegetative shoot apices are technically more tractable than floral apices in model plants.”  
429 (Endress and Doyle, 2007; Okabe, 2011, 2015). Combining both foci (i.e. SAM and FM)  
430 may be quite possible through the use of paleochronically reverted organisms.

431 Biophysical functions affect the permutative phase at the anatomic and  
432 morphologic regions studied here. A continuum might extend to further morphologic fields  
433 generated on flowers of species whose bract numbers increase in multiples beyond the  
434 dual-bract flower structure addressed herein. Theoretically that continuum could be

435 extended longitudinally in segments (i.e. linear spaces) of varying lengths defined by each  
436 bract in a flower of multi-bract species (e.g. *Euphorbia pulcherrima*, *Cornus florida*,  
437 *Quercus* sp.) whenever the master “*srs*” recessive allele (Benya and Windisch, 2007),  
438 homozygous and activated, is accompanied by the necessary “reversion dependent genes”  
439 (Benya, 2012; Benya and Windisch, 2007). Each bract would thus define a specific linear  
440 field ( $\mathbb{F} Bt_{(1,\dots,z)}$ ) with possible accompanying sub-fields of IBS ( $\mathbb{S} IBS_{(1,\dots,x)}$ ) with any  
441 PCL ( $\mathbb{F} PCL$ ) as part of the overall formula from bracts to carpel  $\overline{Bt, Crpl} = T_X$  in  
442 anatomic sequence constituting a statistically dynamic yet mathematical vector space  $\mathcal{L}T_{Ax1}$   
443 whose presence on living specimens of extant species offers a unique tool for research.

444 **Acknowledgements**

445 Saint John's College, Landivar, Belize City, Belize, (T. Thompson, professor) provided  
446 an introduction to material. G.R. Lovell (Griffin, Gerogia, USA), W. Denny (Beltsville,  
447 Maryland, USA) USDA-ARS, T.N. Khan, Dept. Agr. Western Australia and H.P.N.  
448 Gunasena, U. Peradeniya, Sri Lanka provided seed. A.C. Machin assisted with seed  
449 importation. Escola Agrícola Santo Afonso Rodriguez, (J. Moura Carvalho, E.M. Moreira,  
450 J. Bulfoni and I. Govoni) and Escola Técnica Soinho provided facilities for  
451 experimentation. The “Universidade do Vale do Rio dos Sinos” (UNISINOS) and  
452 “Laboratório de Histologia” (Ana Leal-Zanchet, coordinator) furnished facilities for  
453 analysis. A. DePaula, J. M. daSilva, E.O. Alves, J. deFreitas, C.G. deOliveira, F. Gil and  
454 G. & H. Galik helped with technical work and analysis. P G. Windisch, M.C. Moura  
455 Carvalho, C. Radz, S.J.V. Benya and T. H. Oliveir assisted with manuscript preparation.

456  
457 **Compliance with ethical standards**

458 **Conflict of interest:** The author declares that he has no conflict of interest.

459 This research did not receive any specific grant from funding agencies in the public,  
460 commercial or not-for-profit sectors.

461 **REFERENCES**

462 Álvarez-Buylla E. R., Ambrose B. A., Flores-Sandoval E., Vergara-Silva F., Englund M.,

463 Garay-Arroyo A., García-Ponce B., de la Torre-Bárcena E., Espinosa-Matías S.,

464 Martínez E., Piñeyro-Nelson A., Engström P. and Meyerowitz E.M. (2010): B-

465 Function expression in the flower center underlies the homeotic phenotype of

466 *Lacandonia schismatica* (Triuridaceae). - *Plant Cell* **22**: 3543 - 3559

467 [doi.org/10.1105/tpc.109.069153](https://doi.org/10.1105/tpc.109.069153).

468 Ashman, T-L. and Majetic C. J.( 2006): Genetic constraints on floral evolution: a review

469 and evaluation of patterns. - *Heredity* **96**: 343 - 352 [doi.org/10.1038/sj.hdy.6800815](https://doi.org/10.1038/sj.hdy.6800815)

470 Bargmann B. O. R., Vanneste S., Krouk G., Nawy T., Efroni I., Shani E., Choe G., Friml

471 J., Bergmann D. C., Estelle M. and Birnbaum, K. D. (2013): A map of cell type-

472 specific auxin responses. - *Molec Sys Biol* **9**: 688 - 700

473 [doi.org/10.1038/msb.2013.40](https://doi.org/10.1038/msb.2013.40).

474 Battey N. H. and Lyndon R. F. (1990): Reversion of flowering. - *Bot Rev* **56**: 162 - 189

475 [doi.org/10.1007/BF02858534](https://doi.org/10.1007/BF02858534).

476 Benya E. G. F. (1995): Genetic aspects of flower reversion in the winged bean

477 [*Psophocarpus tetragonolobus* (L.) DC]. - *Acta Biol Leopoldensia* **17**: 65 – 72

478 [0000-0002-8566-8346](https://doi.org/10.1007/BF02858534).

479 Benya E. G. F. (2012): Permutation of ground state phylloid buds and flowers from

480 a paleobotanically reverted recombinant of *Psophocarpus*. - *Res Rev in*

481 *Biosci* **6**: 221 - 230 [0000-0002-8566-8346](https://doi.org/10.1007/BF02858534).

482 Benya E. G. F. and Windisch P. G. (2007): A phylloid ground state of reverted

483 floral specimens of *Psophocarpus tetragonolobus* (L.) DC (Fabaceae):

484 cancelled floral meristem and continued floral organ identity. - *Flora* **202**:

485 **437 – 446** [doi.org/10.1016/j.flora.2006.09.004](https://doi.org/10.1016/j.flora.2006.09.004).

486 Besnard F., Refahi Y., Morin V., Marteaux B., Brunoid G., Chambrier P., Rozier  
487 F., Mirabet V., Legrand J., Laine S., Thévenon E., Farcot E., Cellier C.,  
488 Das P., Bishopp A., Dumas R., Parcy F., Helariutta Y., Boudaoud A., Godin  
489 C., Traas J., Guédon Y. and Vernoux T. (2014): Cytokinin signaling  
490 inhibitory fields provide robustness of phyllotaxis. - *Nature* **505**: 417 - 421  
491 [doi.org/10.1038/nature12791](https://doi.org/10.1038/nature12791).

492 Coen E. S. and Meyerowitz E. M. (1991): The war of the whorls: genetic  
493 interactions controlling flower development. - *Nature* **353**: 31 - 37  
494 [doi.org/10.1038/353031a0](https://doi.org/10.1038/353031a0).

495 Debat V. and David P. (2001): Mapping phenotypes: canalization, plasticity and  
496 developmental stability. - *Trends Ecol Evol* **16**: 555 - 561 [doi.org/10.1016/S0169-](https://doi.org/10.1016/S0169-5347(01)02266-2)  
497 [5347\(01\)02266-2](https://doi.org/10.1016/S0169-5347(01)02266-2).

498 Ditta G., Pinyopich A., Robles P., Pelaz S. and Yanofsky M. F. (2004): The *SEP4* gene of  
499 *Arabidopsis thaliana* functions in floral organ and meristem identity. - *Curr Bio*.  
500 **14**: 1935 -1940 [doi.org/10.1016/j.cub.2004.10.028](https://doi.org/10.1016/j.cub.2004.10.028).

501 Endress P. K. and Doyle J. A. (2007): Floral phyllotaxis in basal angiosperms:  
502 development and evolution. - *Curr Opin Plant Bio*. **10**: 52 - 57  
503 [doi.org/10.1016/j.pbi.2006.11.007](https://doi.org/10.1016/j.pbi.2006.11.007).

504 Gadelha de Lima M. (1987): *O Clima de Teresina*. Fundação Universidade Federal do  
505 Piauí, Teresina, 8 pp.

506 Goto K., Kyoizuka J. and Bowman J. L. (2001): Turning floral organs into leaves, leaves  
507 into floral organs. - *Curr Opin Genetics Dev*. **11**: 449 – 456 [doi.org/10.1016/S0959-](https://doi.org/10.1016/S0959-437X(00)00216-1)  
508 [437X\(00\)00216-1](https://doi.org/10.1016/S0959-437X(00)00216-1).

509 Green P. B. and Baxter D. R. (1987): Phyllotactic patterns: characterization by geometrical  
510 activity at the formative region. - *J Theo Bio* **128**: 387 - 395  
511 [doi.org/10.1016/S0022-5193\(87\)80080-2](https://doi.org/10.1016/S0022-5193(87)80080-2).

512 Honma T. and Goto K. (2001): Complexes of MADS-box proteins are sufficient to convert  
513 leaves into floral organs. - *Nature* **409**: 525 – 529 [doi.org/10.1038/35054083](https://doi.org/10.1038/35054083).

514 Ikeda K., Nagasawa N. and Nagato Y. (2005): *ABERRANT PANICLE ORGANIZATION 1*  
515 temporarily regulates meristem identity in rice. - *Dev Bio* **282**: 349 – 360  
516 [doi.org/10.1016/j.ydbio.2005.03.016](https://doi.org/10.1016/j.ydbio.2005.03.016).

517 Jack T. (2004): Molecular and genetic mechanisms of floral control. - *Plant Cell* **16**:  
518 (supplement) S1 - S17 [doi.org/10.1105/tpc.017038](https://doi.org/10.1105/tpc.017038).

519 Jeune B. and Barabé D. (2006): A stochastic approach to phyllotactic patterns analysis. - *J*  
520 *Theo Bio* **238**: 52 – 59 [doi.org/10.1016/j.jtbi.2005.05.036](https://doi.org/10.1016/j.jtbi.2005.05.036).

521 Kidner C. A. and Martienssen R. A. (2005): The role of ARGONAUTE1 (AGO1) in  
522 meristem formation and identity. - *Dev Bio* **280**: 504 - 517  
523 [doi.org/10.1016/j.ydbio.2005.01.031](https://doi.org/10.1016/j.ydbio.2005.01.031).

524 Li X., Li J., Fan Z., Liu Z., Tanaka T. and Yin H. (2017): Global gene expression defines  
525 faded whorl specification of double in *Camellia*. – *Sci Rep* **7**: 3197  
526 [doi:10.1038/s41598-017-03575-2](https://doi.org/10.1038/s41598-017-03575-2).

527 Lohmann D., Stacey N., Breuninger H., Jikumaru Y., Müller D., Sicard A., Leyser O.,  
528 Yamaguchi S. and Lenhard M. (2010): SLOW MOTION is required for within-  
529 plant auxin homeostasis and normal timing of lateral organ initiation at the shoot  
530 meristem in *Arabidopsis*. - *Plant Cell* **22**: 335 – 348  
531 [doi.org/10.1105/tpc.109.071498](https://doi.org/10.1105/tpc.109.071498).

532 Okabe T. (2011): Physical phenomenology of phyllotaxis. - *J Theo Bio* **280**: 63-75  
533 [doi.org/10.1016/j.jtbi.2011.03.037](https://doi.org/10.1016/j.jtbi.2011.03.037).

- 534 Okabe T. (2015): Biophysical optimality of the golden angle in phyllotaxis. - *Sci Rep* **5**:  
535 **15358** [doi.org/10.1038/srep15358](https://doi.org/10.1038/srep15358).
- 536 Okamuro J. K., denBoer B. G. W. and Jofuku K. D. (1993): Regulation of Arabidopsis  
537 flower development. - *Plant Cell* **5**: **1183 – 1193** [doi.org/10.1105/tpc.5.10.1183](https://doi.org/10.1105/tpc.5.10.1183).
- 538 Parcy F., Nilsson O., Busch M. A., Lee I. and Weigel D. (1998): A genetic framework for  
539 floral patterning. - *Nature* **395**: **561 – 566** [doi.org/10.1038/26903](https://doi.org/10.1038/26903).
- 540 Parcy F., Bomblies K. and Weigel D. (2002): Interaction of *LEAFY*, *AGAMOUS* and  
541 *TERMINAL FLOWER1* in maintaining floral meristem identity in *Arabidopsis*. -  
542 *Development* **129**: **2519 - 2527**.
- 543 Pautot V., Dockx J., Hamant O., Kronenberger J., Grandjean O., Jublot D. and Traas J.  
544 (2001): *KNAT2*: Evidence for a link between knotted-like genes and carpel  
545 development. - *Plant Cell* **13**: **1719 – 1734** [doi.org/10.1105/tpc.13.8.1719](https://doi.org/10.1105/tpc.13.8.1719).
- 546 Pelaz S., Ditta G. S., Baumann E., Wisman E. and Yanofsky M. F. (2000): B and C floral  
547 organ identity functions require *SEPALLATA* MADS-box genes. - *Nature* **405**: **200**  
548 **– 203** [doi.org/10.1038/35012103](https://doi.org/10.1038/35012103).
- 549 Piao S., Tan J., Chen A., Fu Y. H., Ciais P., Liu Q., Janssens I. A., Vicca S., Zeng Z.,  
550 Jeong S-J., Li Y., Myneni R. B., Peng S., Shen M. and Peñuelas J. (2015) Leaf  
551 onset in the northern hemisphere triggered by daytime temperature. *Nat Comm* **6**:  
552 **6911** [doi.org/10.1038/ncomms7911](https://doi.org/10.1038/ncomms7911).
- 553 Pinon V., Prasad K., Grigg S.P., Sanchez-Perez G.F. and Scheres B. (2013): Local auxin  
554 biosynthesis regulation by PLETHORA transcription factors controls phyllotaxis in  
555 *Arabidopsis*. - *Proc Natl Acad Sci USA* **110**: **1107 – 1112**  
556 [doi.org/10.1073/pnas.1213497110](https://doi.org/10.1073/pnas.1213497110).
- 557 Prunet N., Morel P., Thierry A-M., Eshed Y., Bowman J. L., Negritiu I. and Trehin, C.  
558 (2008): *REBELOTE*, *SQUINT*, and *ULTRAPETALAI* function redundantly in the



- 559 temporal regulation of floral meristem termination in *Arabidopsis thaliana*. - *Plant*  
560 *Cell* **20**: 901 – 919 [doi.org/10.1105/tpc.107.053306](https://doi.org/10.1105/tpc.107.053306).
- 561 Schwarz-Sommer Z., Huijser P., Nacken W., Saedler H. and Sommer H. (1990): Genetic  
562 control of flower development by homeotic genes in *Antirrhinum majus*. - *Science*  
563 **250**: 931 – 936 [doi.org/10.1126/science.250.4983.931](https://doi.org/10.1126/science.250.4983.931).
- 564 Stern K. R. (1988): *Introductory Plant Biology* - 4th edn. Wm. C. Brown, Dubuque, 616  
565 pp.
- 566 Surridge C. (2004): Plant development: A bunch of leaves. - *Nature* **432**: 161  
567 [doi.org/10.1038/432161a](https://doi.org/10.1038/432161a).
- 568 Trigueros M., Navarrete-Gómez M., Sato S., Christensen S. K., Pelaz S., Weigel D.,  
569 Yanofsky M. F. and Ferrándiz C. (2009): The NGATHA genes direct Style  
570 development in the *Arabidopsis* gynoecium. - *Plant Cell* **21**: 1394 – 1409  
571 [doi.org/10.1105/tpc.109.065508](https://doi.org/10.1105/tpc.109.065508).
- 572 Weigel D. and Meyerowitz E. M. (1994): The ABCs of floral homeotic genes. - *Cell* **78**:  
573 **203 – 209** [doi.org/10.1016/0092-8674\(94\)90291-7](https://doi.org/10.1016/0092-8674(94)90291-7).
- 574 Young D. A. (1978): On the diffusion theory of phyllotaxis. - *J Theo Bio* **71**: 421 – 432  
575 [doi.org/10.1016/0022-5193\(78\)90169-8](https://doi.org/10.1016/0022-5193(78)90169-8)

576

577

578

579

580

581

582

583

584 **FIGURES (Captions)**

585  
586 **Figure 1.** Flowers *Psophocarpus tetragonolobus*; normal (i.e. wild type; [left]) and  
587 reverted (i.e. a phylloid state, meristematically inactive, bracts and calyx regions  
588 juxtaposed; [right]).

589  
590 **Figure 2.** Reverted flower presenting beginning phyllome condition of whorls organs and  
591 permutation:  
592 carpel (top)  
593 petals (ptl) [sides]  
594 stamens (normal) [stamens region]  
595 calyx region [sepals]  
596 pericladial stalk (PCL)  
597 bracts (parallel) and calyx regions distanced about 1 cm from each other.

598  
599 **Figure 3.** Reverted flower: Bracts (Bt) and bracts dislocation forming an “inter-bracts  
600 stem” (IBS) of about 4 mm (measured from locus center of one bract to locus center of  
601 second bract); Pericladial stalk (PCL) of about 8 mm distancing pedicel-bract zone from  
602 whorls zone; Calyx (petals and stamens removed for clarity); Gynophore (Gnf) of about 12  
603 mm connecting to a Cupule-like structure (Cupl) of about 8 mm leading to a webbed carpel  
604 (Crpl) showing vascularization and initial spiraling (Benya and Windisch, 2007, Suppl.  
605 Material, photo amplified, cropped and adapted [photoshop] for this figure).

606  
607 **Figure 4.** Webbing between carpel clefts is a first necessary step in permutation at the  
608 carpel.

609 **Figure 5.** Vascularized carpel with initial diadnation of about 60%, acropetal along adaxial  
610 cleft.

611

612 **Figure 6.** Reverted flower: Permutated carpel on extended cupule-like structure presenting  
613 the four necessary permutation steps leading to complete carpel foliation:

614 1. Webbing between carpel clefts;

615 2. Vascularized webbing

616 3. Carpel deadnation (acropetal along adaxial cleft);

617 4. Initial carpel foliation (putative ovules).

618

619 **Figure 7.** Reverted flower: Parallel carpel clefts, no webbing, definite diadnation, showing  
620 foliation presenting a “pinnate” carpel structure (top) [referential notation of photo  
621 removed for simplicity].

622

**Table 1:** Putative “necessary structural permutation and developmental steps” within the carpel, begin with ground state, un-webbed, parallel carpel clefts and progress in steps, each of which can be terminal OR continuous to the next step.

|     | <u>Step 1</u>                                                                              | <u>Step 2</u>       | <u>Step3</u>          | <u>Step 4</u>              | <u>Step 5</u> | Number of<br><u>specimens</u> |
|-----|--------------------------------------------------------------------------------------------|---------------------|-----------------------|----------------------------|---------------|-------------------------------|
| 623 | <b>Table 1:</b> Putative “necessary structural permutation and developmental steps” within |                     |                       |                            |               |                               |
| 624 | the carpel, begin with ground state, un-webbed, parallel carpel clefts and progress in     |                     |                       |                            |               |                               |
| 625 | steps, each of which can be terminal OR continuous to the next step.                       |                     |                       |                            |               |                               |
| 626 |                                                                                            |                     |                       |                            |               | Number of                     |
| 627 | <u>Step 1</u>                                                                              | <u>Step 2</u>       | <u>Step3</u>          | <u>Step 4</u>              | <u>Step 5</u> | <u>specimens</u>              |
| 628 | 1. Ground state,                                                                           |                     |                       |                            |               | 3                             |
| 629 | <b>carpel un-webbed</b>                                                                    |                     |                       |                            |               |                               |
| 630 | (clefts parallel)                                                                          |                     |                       |                            |               |                               |
| 631 |                                                                                            |                     |                       |                            |               |                               |
| 632 | 2. Ground state,                                                                           |                     |                       |                            |               |                               |
| 633 | carpel un-webbed ⇒ <b>webbed</b>                                                           |                     |                       |                            |               |                               |
| 634 |                                                                                            | <b>carpel</b>       |                       |                            |               | 2                             |
| 635 |                                                                                            | (planation [Fig 4]) |                       |                            |               |                               |
| 636 | 3. Ground state,                                                                           |                     |                       |                            |               |                               |
| 637 | carpel un-webbed ⇒ webbed ⇒ <b>vascularized</b>                                            |                     |                       |                            |               |                               |
| 638 |                                                                                            | carpel              | <b>carpel</b> (Fig 3) |                            |               | 10                            |
| 639 | 4. Ground state,                                                                           |                     |                       |                            |               |                               |
| 640 | carpel un-webbed ⇒ webbed ⇒ vascularized ⇒ <b>carpel</b>                                   |                     |                       |                            |               |                               |
| 641 |                                                                                            | carpel              | carpel                | <b>diadnation</b>          |               | 2                             |
| 642 |                                                                                            |                     |                       | (Fig 5)                    |               |                               |
| 643 | 5. Ground state,                                                                           |                     |                       |                            |               |                               |
| 644 | carpel un-webbed ⇒ webbed ⇒ vascularized ⇒ <b>carpel</b>                                   |                     |                       |                            |               |                               |
| 645 |                                                                                            | carpel              | carpel                | diadnation ⇒ <b>carpel</b> |               |                               |
| 646 |                                                                                            |                     |                       | <b>foliation</b>           |               | 21                            |
| 647 |                                                                                            |                     |                       |                            |               |                               |

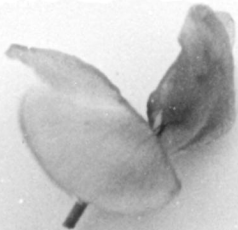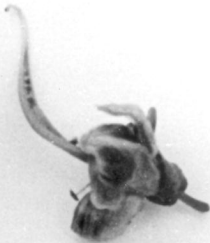

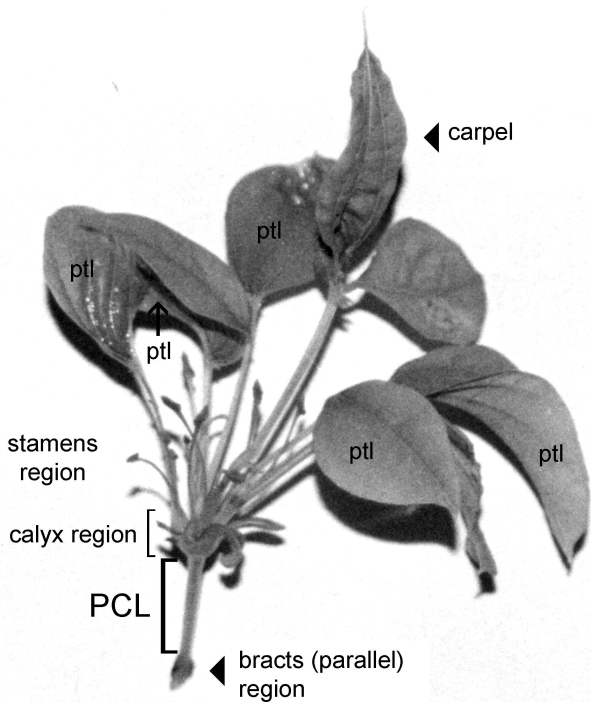

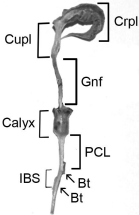

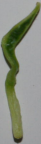



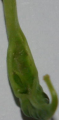

bioRxiv preprint doi: <https://doi.org/10.1101/197054>; this version posted September 13, 2017. The copyright holder for this preprint (which was not certified by peer review) is the author/funder, who has granted bioRxiv a license to display the preprint in perpetuity. It is made available under aCC-BY-NC-ND 4.0 International license.

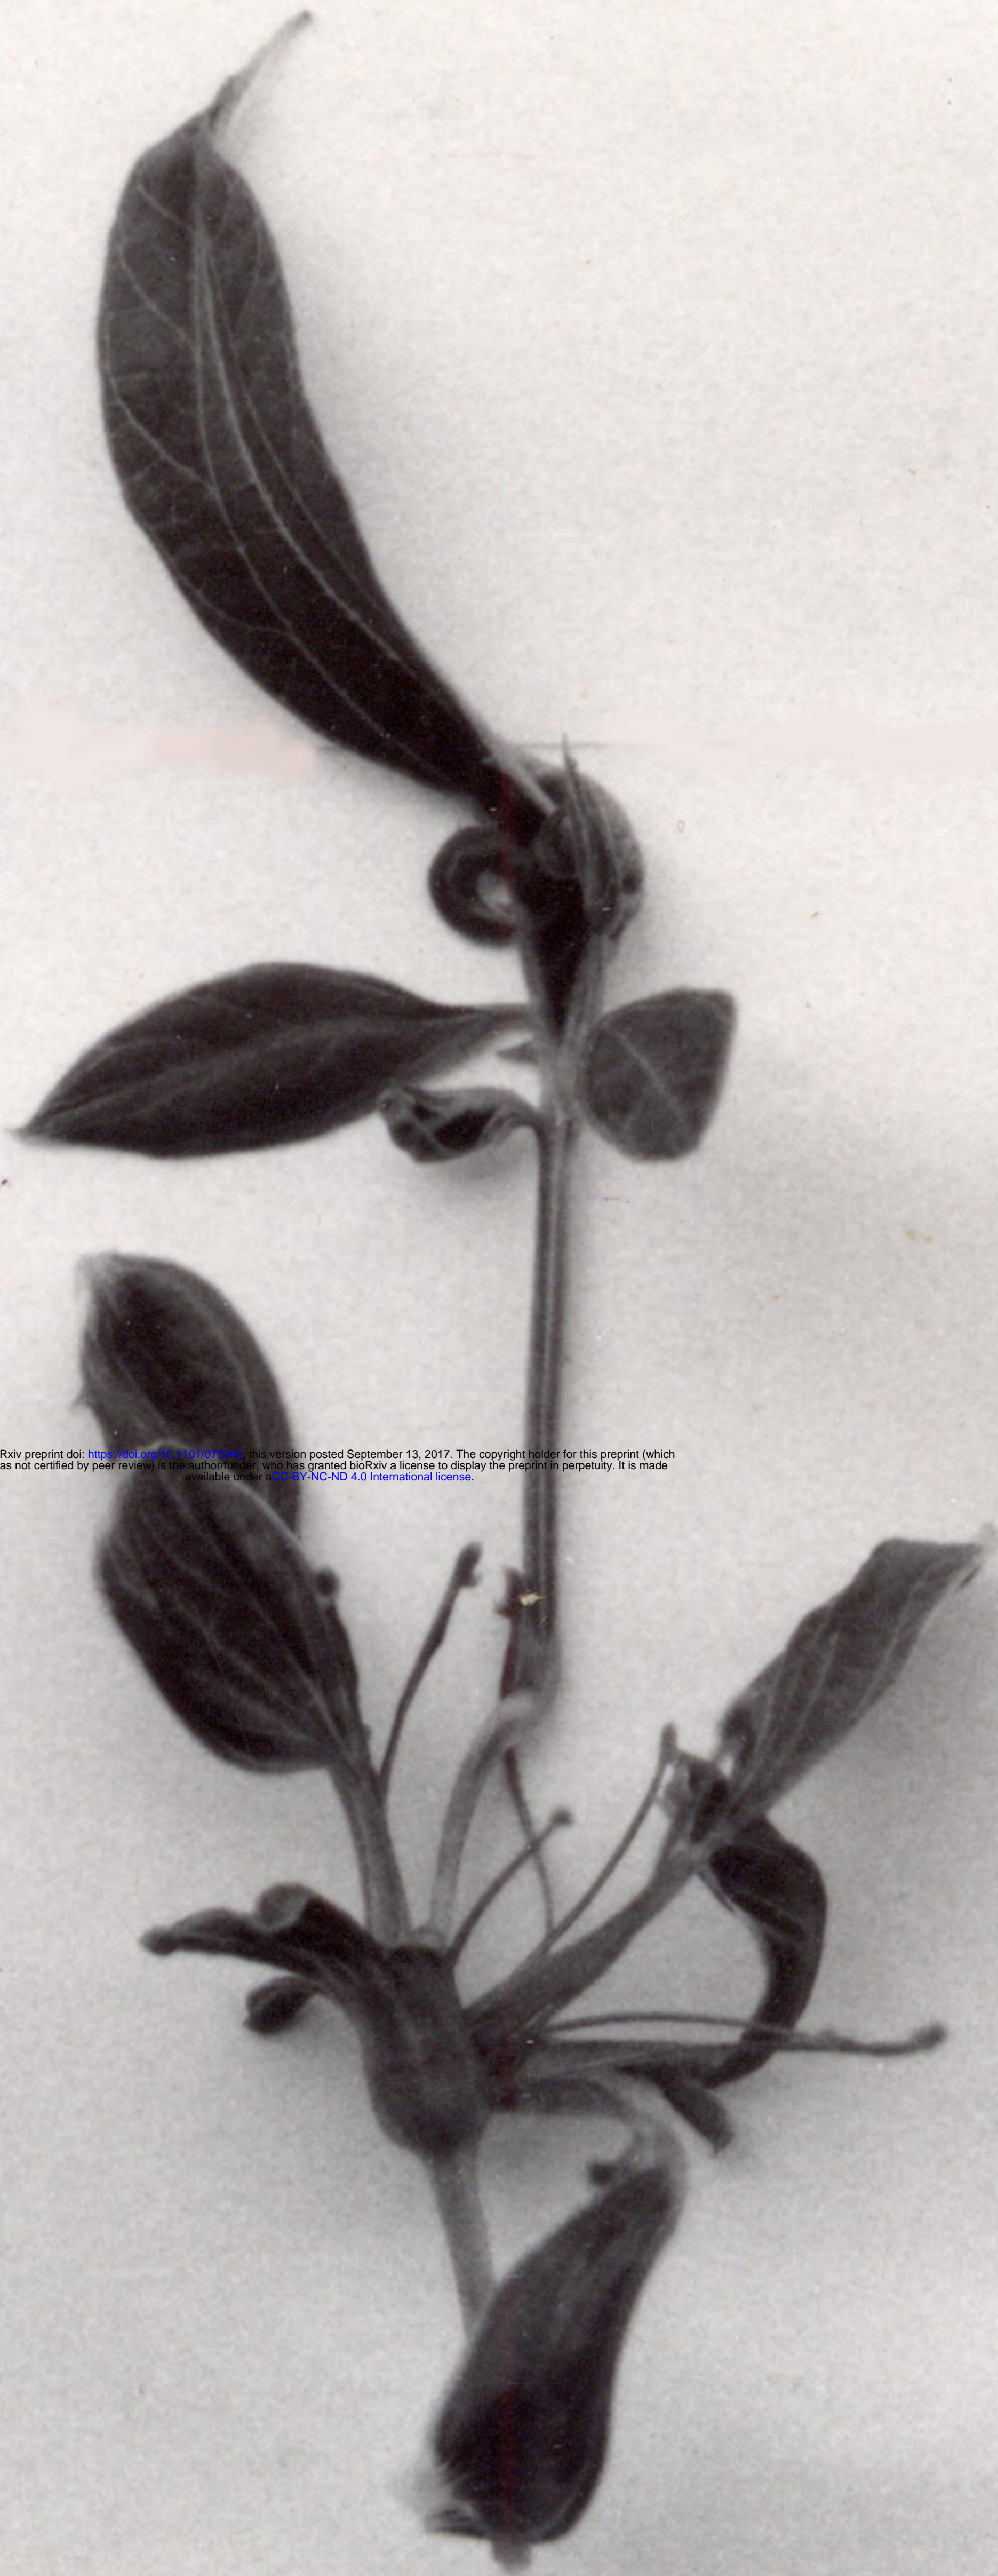

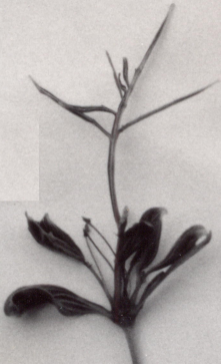

Source: http://biorxiv.org/content/10.1101/070540v5.full.pdf
